# Supplementary material for: Coronary Artery Disease with Elevated Levels of HDL Cholesterol Is Associated with Distinct Lipid Signatures
Source: MDPI journal article supplement (doi:10.3390/metabo13060695), 2023-05-26
Supplement: s1 [file s1]

## Supplementary materials

Original article

### **Coronary Artery Disease with Elevated Levels of HDL Cholesterol is Associated with Distinct Lipid Signatures**

Wanying Xia<sup>a</sup>, Haiyi Yu<sup>a\*</sup>, Guisong Wang<sup>a\*</sup>

<sup>a</sup> Department of Cardiology and Institute of Vascular Medicine, Peking University Third Hospital; NHC Key Laboratory of Cardiovascular Molecular Biology and Regulatory Peptides; Key Laboratory of Molecular Cardiovascular Science, Ministry of Education; Beijing Key Laboratory of Cardiovascular Receptors Research, No. 49 North Garden Road, Haidian District, Beijing 100191, China

\*Corresponding author:

Haiyi Yu, PhD

Department of Cardiology and Institute of Vascular Medicine, Peking University Third Hospital, No. 49 North Garden Road, Haidian District, Beijing 100191, China

Email: yuhaiyi@bjmu.edu.cn

Guisong Wang, MD

Department of Cardiology and Institute of Vascular Medicine, Peking University Third Hospital, No. 49 North Garden Road, Haidian District, Beijing 100191, China

Phone: +86015611908831

Fax: 86-10-62361450

Email: [guisongwang@bjmu.edu.cn](mailto:guisongwang@bjmu.edu.cn)

## Section 1: Resources of materials

**Table S1.** Resources of materials.

| Material                          | Manufacturer        | Identifier  |
|-----------------------------------|---------------------|-------------|
| Chloroform (HPLC grade)           | Honeywell           | 049-4       |
| Methanol (HPLC grade)             | Fisher chemical     | A452-4      |
| Luna 3 µm-silica column           | Phenomenex          | 00F-4162-b0 |
| Kinetex-C18 2.6 mm column         | Phenomenex          | 00D-4462-e0 |
| PE-14:0/14:0                      | Avanti Polar Lipids | 850745P     |
| d <sub>31</sub> -PE-(16:0/18:1)   | Avanti Polar Lipids | 860374C     |
| d <sub>31</sub> -PS-(16:0/18:1)   | Avanti Polar Lipids | 860403C     |
| PA-17:0/17:0                      | Avanti Polar Lipids | 830856P     |
| PG-14:0/14:0                      | Avanti Polar Lipids | 840445P     |
| d <sub>31</sub> -PG- (16:0/18:1)  | Avanti Polar Lipids | 860384C     |
| d <sub>31</sub> -PI-(16:0/18:1)   | Avanti Polar Lipids | 860042P     |
| SM-d18:1/12:0                     | Avanti Polar Lipids | 860583P     |
| LPC-17:0                          | Avanti Polar Lipids | 855676P     |
| LPE-17:1                          | Avanti Polar Lipids | 110699      |
| LPI-17:1                          | Avanti Polar Lipids | 850103P     |
| LPA-17:0                          | Avanti Polar Lipids | 857127P     |
| LPS-17:1                          | Avanti Polar Lipids | 858141P     |
| S1P-d17:1                         | Avanti Polar Lipids | 860641P     |
| Cer-d18:1/17:0                    | Avanti Polar Lipids | 860517P     |
| GlcCer-d18:1/8:0                  | Avanti Polar Lipids | 860540P     |
| GalCer-d18:1/8:0                  | Avanti Polar Lipids | 860538P     |
| PI-8:0/8:0                        | Echelon             | P-0008      |
| d <sub>3</sub> -GM3-d18:1/18:0    | Matreya LLC         | 2052        |
| d <sub>3</sub> -LacCer-d18:1/16:0 | Matreya LLC         | 1534        |
| d <sub>5</sub> -DAG-16:0/16:0     | Avanti Polar Lipids | 110537      |

|                               |                     |        |
|-------------------------------|---------------------|--------|
| d <sub>5</sub> -DAG-18:1/18:1 | Avanti Polar Lipids | 110581 |
| d <sub>5</sub> -TAG-(14:0)3   | C/D/N Isotopes      | D-6958 |
| d <sub>5</sub> -TAG-(16:0)3   | C/D/N Isotopes      | D-5815 |
| d <sub>5</sub> -TAG-(18:0)3   | C/D/N Isotopes      | D-5816 |
| d <sub>6</sub> -cholesterol   | C/D/N Isotopes      | D-2139 |
| d <sub>6</sub> -CE18:0        | C/D/N Isotopes      | D-5823 |

PE = phosphatidylethanolamine; PS = phosphatidylserine; PA = phosphatidic acid; PG = phosphatidylglycerol; PI phosphatidylinositol; SM = sphingomyelin; LPC = lyso-phosphatidylcholine; LPE = lyso-PE; LPI = lyso-PI; LPA = lyso-PA; LPS = lyso-PS; S1P = sphingosine-1-phosphate; Cer = ceramide; GlcCer = glucosylceramide; Galcer = galactosylceramide; GM3 = monosialo-dihexosyl ganglioside; LacCer = lactosylceramide; DAG = diacylglycerol; TAG = triacylglycerol; CE = cholesteryl ester.

## Section 2: Supplementary results

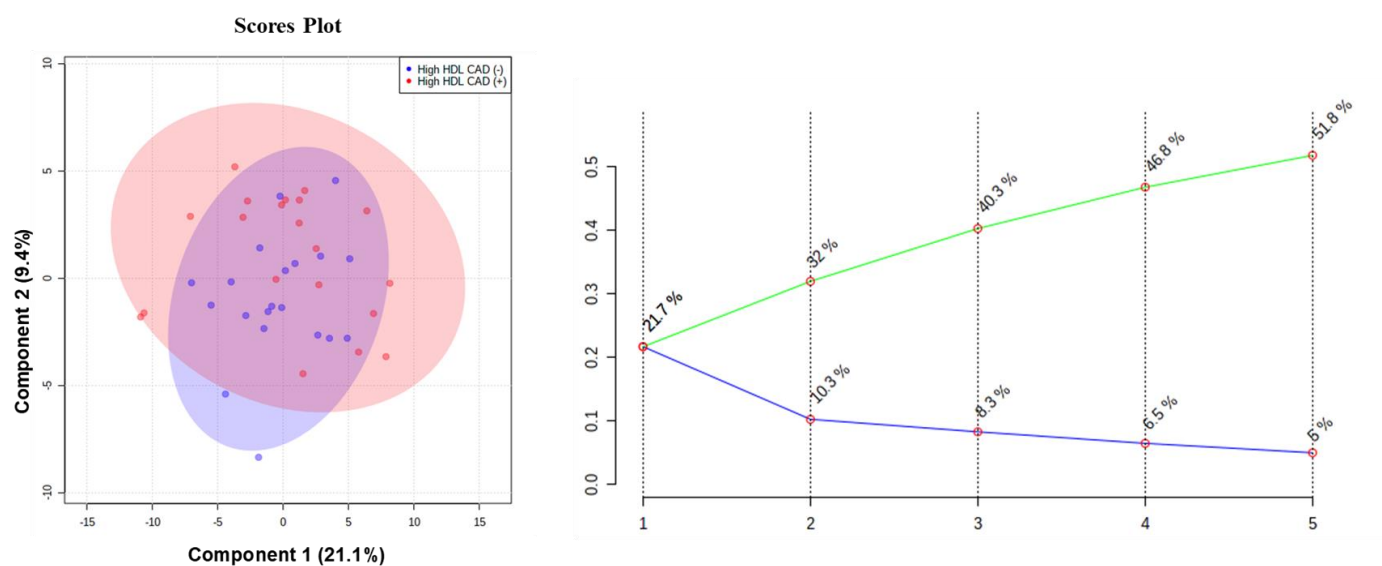

**Figure S1.** (A) Principal component analysis (PCA) scores plot of CAD High HDL and Control High HDL with 95% confidence regions (each sample is represented by a point). (B) PCA scree plot (the green line on top shows the accumulated variance explained; the blue line underneath shows the variance explained by individual principal components).

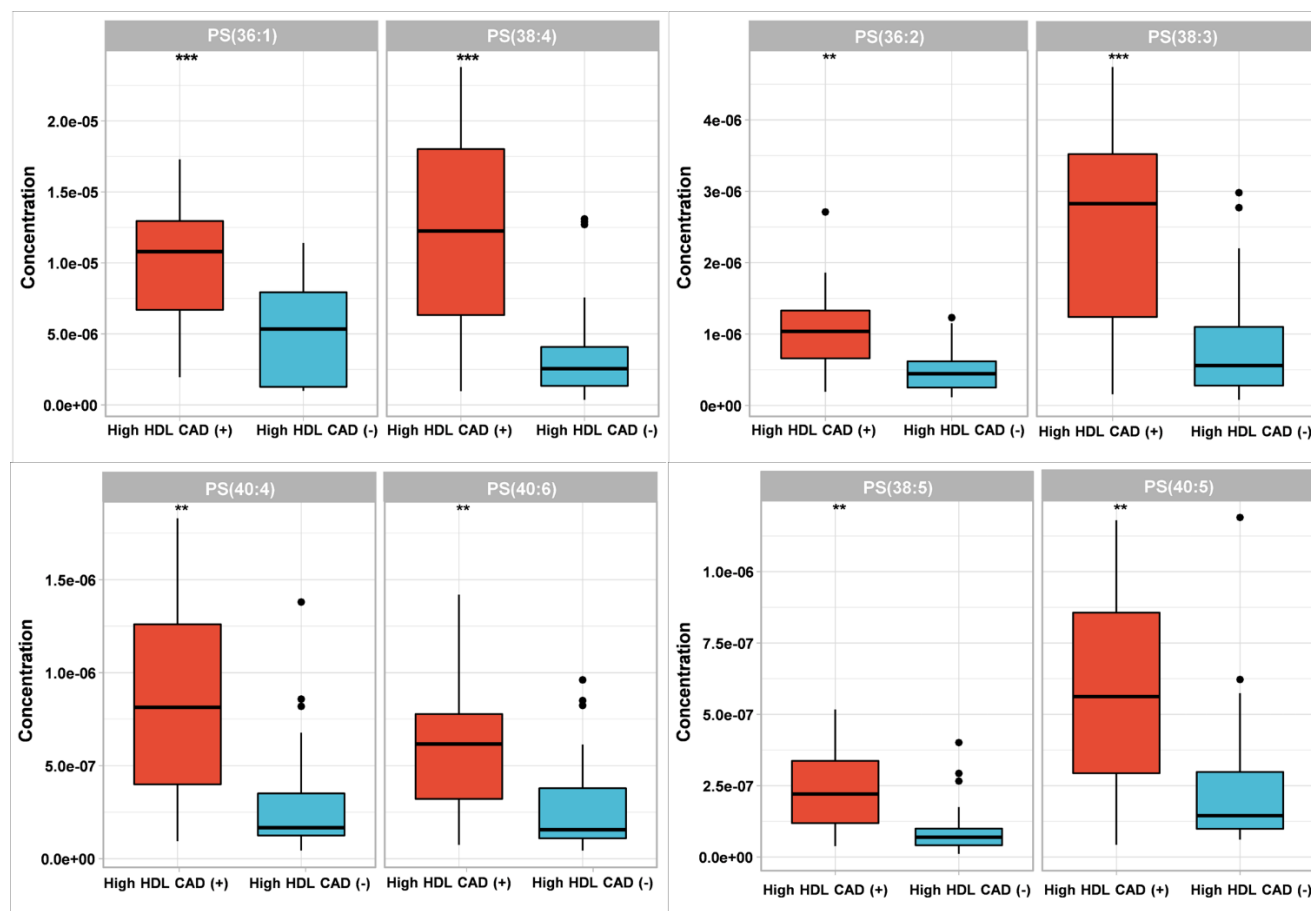

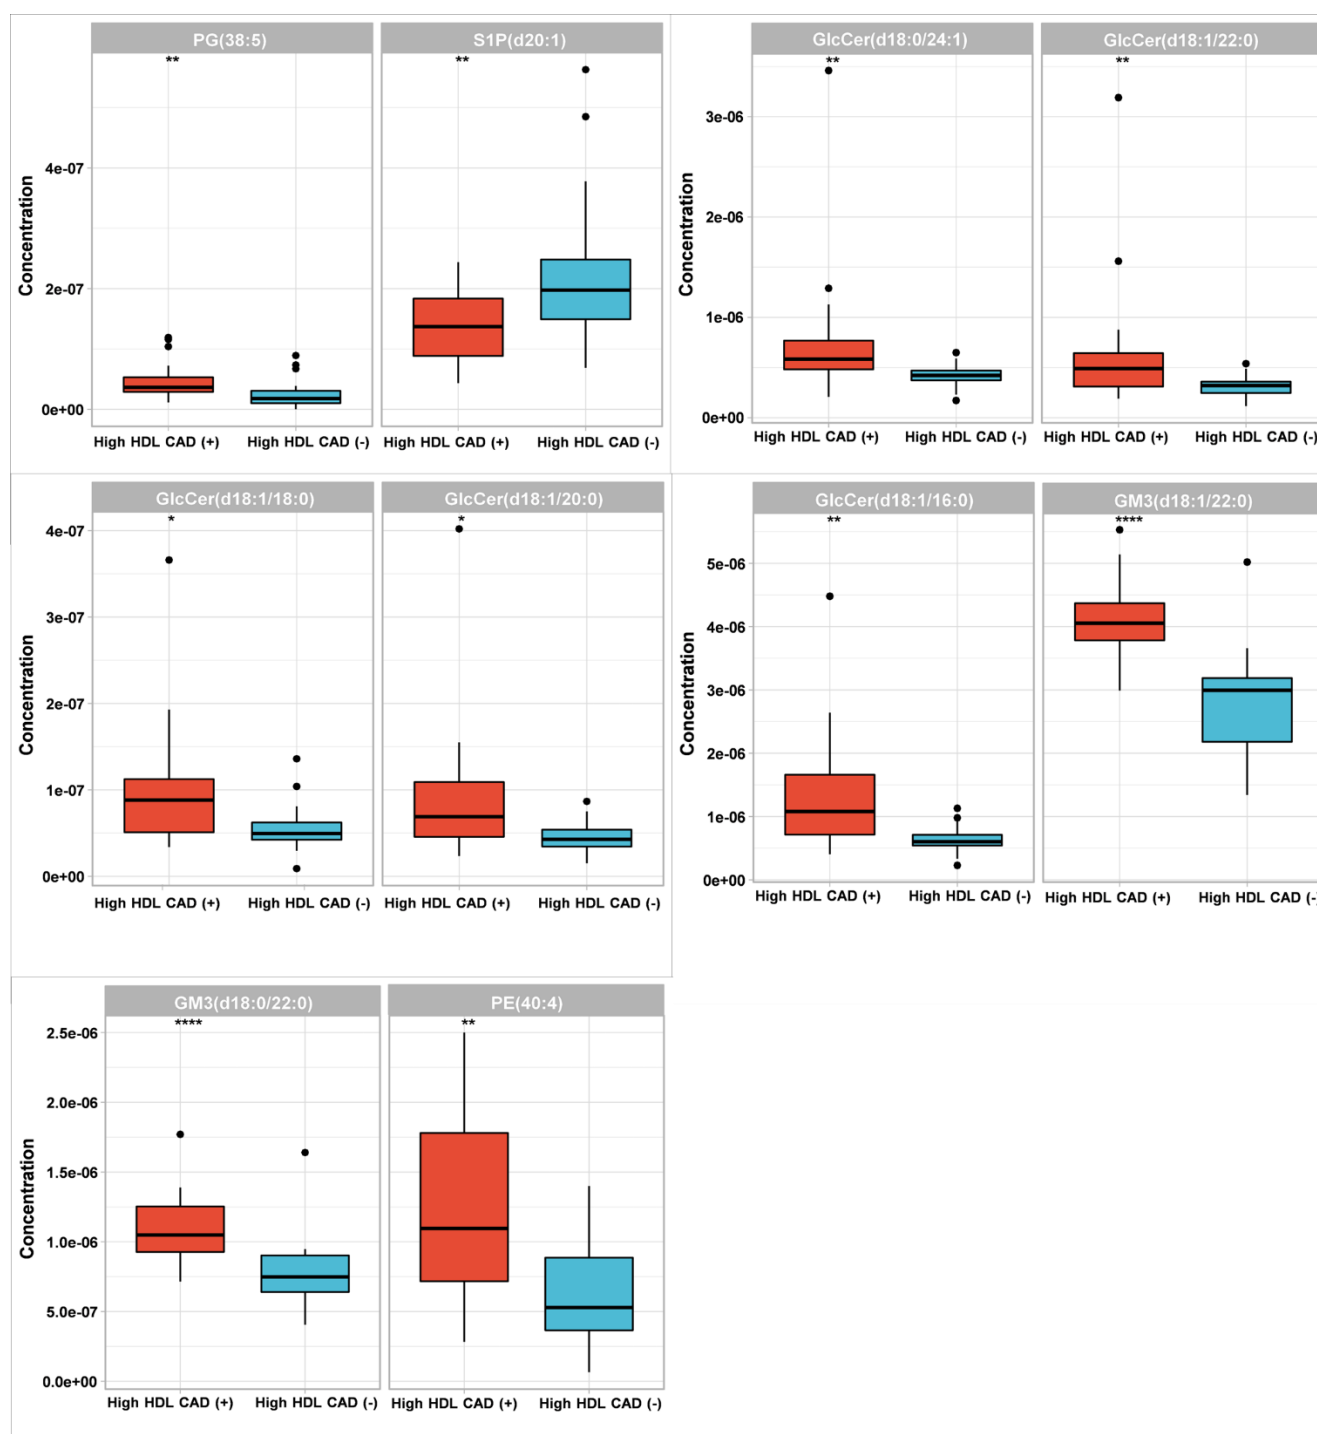

**Figure S2.** Boxplots of differential lipid species.

PE = phosphatidylethanolamine; PS = phosphatidylserine; PG = phosphatidylglycerol; S1P = sphingosine-1-phosphate; GlcCer = glucosylceramide; GM3 = monosialo-dihexosyl ganglioside.

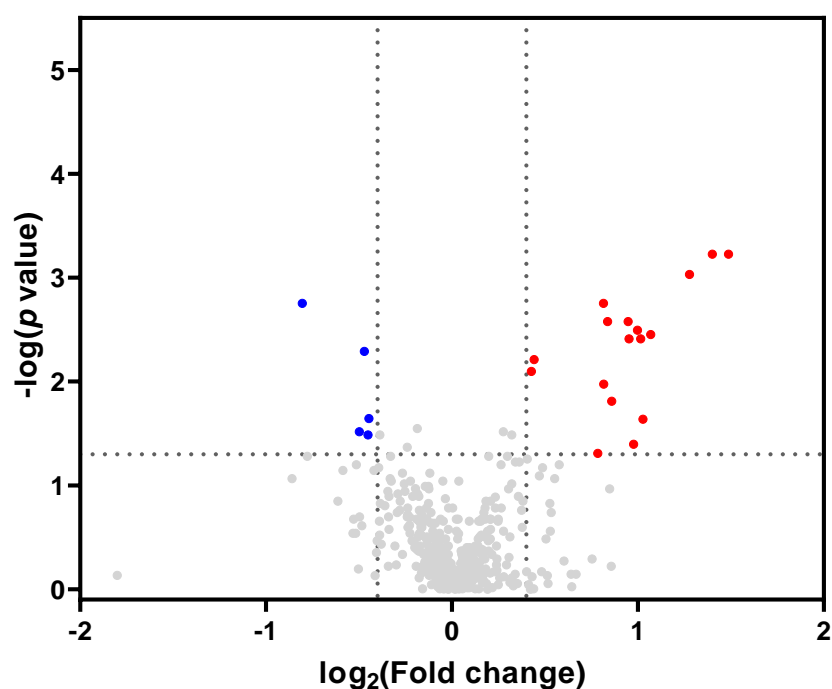

**Figure S3.** Volcano plot of the differential lipids based on normalized data. Red plots indicate lipids are up-regulated in High HDL CAD (+) group and blue means down-regulated. Gray plots represent insignificantly altered lipids.

**Table S2.** Lipid species with statistical significance by Wilcoxon test.

| Lipid species | <i>p</i> value | Adjusted <i>p</i> value | Lipid species      | <i>p</i> value | Adjusted <i>p</i> value |
|---------------|----------------|-------------------------|--------------------|----------------|-------------------------|
| CE(18:2)      | 0.006          | 0.033                   | PS(40:5)           | < 0.001        | 0.019                   |
| PA(36:1)      | 0.033          | 0.047                   | PS(40:6)           | 0.002          | 0.010                   |
| PE(34:2)      | 0.045          | 0.071                   | LPE(18:0)          | 0.001          | 0.482                   |
| PE(36:1)      | 0.020          | 0.063                   | LPS(18:1)          | 0.006          | 0.146                   |
| PE(38:3)      | 0.006          | 0.121                   | LPC(18:2)          | 0.006          | 0.037                   |
| PE(38:4)      | 0.041          | 0.111                   | TAG42:0(14:0)      | 0.043          | 0.149                   |
| PE(38:6p)     | 0.021          | 0.107                   | TAG44:1(14:1)      | 0.042          | 0.053                   |
| PE(40:4)      | 0.017          | 0.024                   | Cer(d18:1/24:0)    | 0.028          | 0.220                   |
| PE(42:5)      | 0.011          | 0.170                   | GlcCer(d18:0/24:1) | 0.005          | 0.015                   |
| PG(38:5)      | 0.026          | 0.037                   | GlcCer(d18:1/16:0) | 0.003          | 0.026                   |
| PG(38:6)      | 0.005          | 0.080                   | GlcCer(d18:1/18:0) | 0.010          | 0.034                   |

|          |       |       |                    |         |       |
|----------|-------|-------|--------------------|---------|-------|
| PS(36:1) | 0.028 | 0.012 | GlcCer(d18:1/20:0) | 0.011   | 0.020 |
| PS(36:2) | 0.004 | 0.014 | GlcCer(d18:1/22:0) | 0.007   | 0.037 |
| PS(38:3) | 0.046 | 0.008 | GM3(d18:0/22:0)    | < 0.001 | 0.009 |
| PS(38:4) | 0.001 | 0.008 | GM3(d18:1/22:0)    | < 0.001 | 0.010 |
| PS(38:5) | 0.001 | 0.034 | GM3(d18:1/24:0)    | < 0.001 | 0.009 |
| PS(40:4) | 0.001 | 0.010 | S1P(d20:1)         | 0.004   | 0.015 |

CE = cholesteryl ester; PA = phosphatidic acid; PE = phosphatidylethanolamine; PG = phosphatidylglycerol; PS = phosphatidylserine; LPE = lyso-PE; LPS = lyso-PS; LPC = lyso-phosphatidylcholine; TAG = triacylglycerol; Cer = ceramide; GlcCer = glucosylceramide; GM3 = monosialo-dihexosyl ganglioside; S1P = sphingosine-1-phosphate.

**Table S3.** Differential lipid species to distinguish the High HDL CAD (+) group from the High HDL CAD (-) group based on normalized data.

| Lipid species       | <i>p</i> value <sup>a</sup> | Adjusted <i>p</i> value <sup>b</sup> | FC <sup>c</sup> | VIP <sup>d</sup> |
|---------------------|-----------------------------|--------------------------------------|-----------------|------------------|
| Sphingolipid        |                             |                                      |                 |                  |
| GM3(d18:1/22:0)     | 0.023                       | 0.010                                | 2.039           | 2.05             |
| GM3(d18:0/22:0)     | 0.008                       | 0.009                                | 1.344           | 1.97             |
| GlcCer(d18:1/16:0)  | 0.003                       | 0.026                                | 1.997           | 2.65             |
| GlcCer(d18:0/24:1)  | 0.015                       | 0.015                                | 1.814           | 2.00             |
| GlcCer(d18:1/22:0)  | 0.023                       | 0.037                                | 2.039           | 2.22             |
| GlcCer(d18:1/18:0)  | 0.049                       | 0.034                                | 1.723           | 2.16             |
| GlcCer(d18:1/20:0)  | 0.023                       | 0.020                                | 2.039           | 2.06             |
| S1P(d20:1)          | 0.002                       | 0.015                                | 0.573           | 2.79             |
| Glycerophospholipid |                             |                                      |                 |                  |
| PS(38:4)            | 0.001                       | 0.008                                | 2.803           | 4.35             |
| PS(38:3)            | 0.001                       | 0.008                                | 2.641           | 4.17             |
| PS(36:1)            | 0.002                       | 0.012                                | 1.760           | 3.05             |
| PS(36:2)            | 0.003                       | 0.014                                | 1.928           | 3.07             |
| PS(40:4)            | 0.011                       | 0.010                                | 1.761           | 3.86             |
| PS(38:5)            | 0.004                       | 0.034                                | 2.098           | 3.49             |
| PS(40:6)            | 0.004                       | 0.010                                | 1.934           | 3.36             |
| PS(40:5)            | 0.004                       | 0.019                                | 2.021           | 3.05             |
| PE(40:4)            | 0.001                       | 0.024                                | 2.425           | 2.79             |
| PG(38:5)            | 0.004                       | 0.037                                | 2.098           | 3.62             |
| PC(36:4p)           | 0.005                       | 0.084                                | 0.721           | 2.02             |
| Glycerolipid        |                             |                                      |                 |                  |
| TAG51:3(15:0)       | 0.023                       | 0.221                                | 0.734           | 1.84             |

<sup>a</sup> *p* value generated by Wilcoxon test with a threshold of 0.05.

<sup>b</sup> *p* value was adjusted by age, sex, smoking status, and hs-CRP.

<sup>c</sup> VIP was obtained from PLS-DA model with a threshold of > 1.8.

<sup>d</sup> FC was calculated based on mean ratios for lipids of patients with CAD to lipids of controls.

VIP = variable importance in projection; FC = fold change; GM3 = monosialo-dihexosyl ganglioside; GlcCer = glucosylceramide; S1P = sphingosine-1-phosphate; PS = phosphatidylserine; PE = phosphatidylethanolamine; PG = phosphatidylglycerol; PC = phosphatidylcholine; TAG = triacylglycerol.

**Table S4.** Spearman correlation coefficients between differential lipid species and lipid data.

|                    | TC                 | LDL                | HDL                 | TG                 | ApoA1               | ApoB                | Lp(a)               |
|--------------------|--------------------|--------------------|---------------------|--------------------|---------------------|---------------------|---------------------|
| PE(40:4)           | 0.224              | 0.181              | -0.161              | 0.262              | 0.041               | 0.3                 | -0.034              |
| PS(36:2)           | 0.323 <sup>a</sup> | 0.357 <sup>a</sup> | -0.195              | 0.263              | 0.005               | 0.416 <sup>a</sup>  | 0.146               |
| PS(36:1)           | 0.303              | 0.334 <sup>a</sup> | -0.185              | 0.25               | 0.022               | 0.409 <sup>a</sup>  | 0.142               |
| PS(38:5)           | 0.364 <sup>a</sup> | 0.414 <sup>a</sup> | -0.224              | 0.354 <sup>a</sup> | 0.019               | 0.487 <sup>a</sup>  | 0.222               |
| PS(38:4)           | 0.332 <sup>a</sup> | 0.364 <sup>a</sup> | -0.162              | 0.282              | 0.057               | 0.452 <sup>a</sup>  | 0.2                 |
| PS(38:3)           | 0.330 <sup>a</sup> | 0.370 <sup>a</sup> | -0.202              | 0.284              | 0.005               | 0.441 <sup>a</sup>  | 0.218               |
| PS(40:6)           | 0.324 <sup>a</sup> | 0.348 <sup>a</sup> | -0.372 <sup>a</sup> | 0.434 <sup>a</sup> | -0.017              | 0.471 <sup>a</sup>  | 0.311               |
| PS(40:5)           | 0.415 <sup>a</sup> | 0.424 <sup>a</sup> | -0.318 <sup>a</sup> | 0.428 <sup>a</sup> | 0.045               | 0.530 <sup>a</sup>  | 0.209               |
| PS(40:4)           | 0.354 <sup>a</sup> | 0.383 <sup>a</sup> | -0.321 <sup>a</sup> | 0.372 <sup>a</sup> | -0.008              | 0.483 <sup>a</sup>  | 0.209               |
| PG(38:5)           | 0.134              | 0.065              | 0.003               | 0.135              | 0.253               | 0.094               | 0.176               |
| GM3(d18:1/22:0)    | 0.181              | 0.142              | -0.028              | 0.173              | 0.041               | 0.22                | 0.313 <sup>a</sup>  |
| GM3(d18:0/22:0)    | 0.248              | 0.259              | -0.101              | 0.126              | 0.064               | 0.258               | 0.232               |
| S1P(d20:1)         | -0.179             | -0.24              | 0.098               | -0.18              | -0.043              | -0.406 <sup>a</sup> | -0.395 <sup>a</sup> |
| GlcCer(d18:1/16:0) | 0.249              | 0.315 <sup>a</sup> | -0.425 <sup>a</sup> | 0.151              | -0.302              | 0.383 <sup>a</sup>  | 0.353 <sup>a</sup>  |
| GlcCer(d18:1/18:0) | 0.128              | 0.186              | -0.423 <sup>a</sup> | 0.212              | -0.298              | 0.331 <sup>a</sup>  | 0.365 <sup>a</sup>  |
| GlcCer(d18:1/20:0) | 0.171              | 0.226              | -0.356 <sup>a</sup> | 0.285              | -0.186              | 0.347 <sup>a</sup>  | 0.307               |
| GlcCer(d18:1/22:0) | 0.294              | 0.393 <sup>a</sup> | -0.262              | 0.14               | -0.195              | 0.413 <sup>a</sup>  | 0.245               |
| GlcCer(d18:0/24:1) | 0.027              | 0.106              | -0.417 <sup>a</sup> | 0.116              | -0.380 <sup>a</sup> | 0.161               | 0.286               |

<sup>a</sup>  $p < 0.05$ ;

PE = phosphatidylethanolamine; PS = phosphatidylserine; PG = phosphatidylglycerol; S1P = sphingosine-1-phosphate; GM3= monosialo-dihexosyl ganglioside; GlcCer = glucosylceramide; TC = total cholesterol; LDL-C = low density lipoprotein cholesterol; HDL-C = high density lipoprotein cholesterol; TG = total triglyceride; Apo A1 = apolipoprotein A1; Apo B = apolipoprotein B; Lp(a) = lipoprotein(a)



**Table S5.** Confusion matrix of predicted class probabilities across the 100 cross-validations.

| Group            | High HDL CAD (+) | High HDL CAD (-) |
|------------------|------------------|------------------|
| High HDL CAD (+) | 19               | 4                |
| High HDL CAD (-) | 1                | 16               |
